# Supplementary material
Source: Springer Nature journal article supplement (https://www.springermedizin.de/resource/supplementary/13058_2013_3591_MOESM2_ESM.pdf/9703890)
Supplement: MOESM2 [file 9703890]

**Additional Table: Characteristics of women enrolled in the four clinical trials**

| Variables                     | Study GEICAM/9805    | Study GEICAM/9906    | Study BCIRG001       | Study GEICAM/2003-02 |
|-------------------------------|----------------------|----------------------|----------------------|----------------------|
|                               | N=1060               | N=1246               | N=1491               | N=1925               |
| Recruitment period            | Jun 1999 to Mar 2003 | Nov 1999 to Jun 2002 | Apr 1997 to May 1999 | Sep 2003 to May 2008 |
| Age at Diagnosis              |                      |                      |                      |                      |
| 23-44                         | 312 (29.4%)          | 365 (29.3%)          | 482 (32.3%)          | 519 (27.0%)          |
| 45-54                         | 356 (33.6%)          | 422 (33.9%)          | 577 (38.7%)          | 694 (36.1%)          |
| 55-64                         | 308 (29.1%)          | 279 (22.4%)          | 343 (23.0%)          | 523 (27.2%)          |
| 65-76                         | 84 (7.9%)            | 180 (14.4%)          | 89 (6.0%)            | 189 (9.8%)           |
| Mean (SD)                     | 50.3 (10.1)          | 51.1 (10.8)          | 49.1 (9.4)           | 50.9 (9.96)          |
| Menopausal Status             |                      |                      |                      |                      |
| Postmenopausal                | 487 (45.9%)          | 567 (45.5%)          | 655 (43.9%)          | 971 (50.4%)          |
| Premenopausal                 | 573 (54.1%)          | 679 (54.5%)          | 836 (56.1%)          | 954 (49.6%)          |
| Histology                     |                      |                      |                      |                      |
| Ductal                        | 908 (85.7%)          | 1060 (85.1%)         | 1227 (82.3%)         | 1645 (85.5%)         |
| Lobulillar                    | 83 (7.8%)            | 127 (10.2%)          | 144 (9.7%)           | 160 (8.3%)           |
| Mixed                         | 12 (1.1%)            | 26 (2.1%)            | 25 (1.7%)            | 0 (0.0%)             |
| Others                        | 57 (5.4%)            | 32 (2.6%)            | 95 (6.4%)            | 120 (6.2%)           |
| Unknown                       | 0 (0.0%)             | 1 (0.1%)             | 0 (0.0%)             | 0 (0.0%)             |
| Histological Grade            |                      |                      |                      |                      |
| 1                             | 72 (6.8%)            | 178 (14.3%)          | 125 (8.4%)           | 125 (6.5%)           |
| 2                             | 446 (42.1%)          | 528 (42.4%)          | 568 (38.1%)          | 880 (45.7%)          |
| 3                             | 490 (46.2%)          | 431 (34.6%)          | 638 (42.8%)          | 849 (44.1%)          |
| Unknown                       | 52 (4.9%)            | 109 (8.7%)           | 160 (10.7%)          | 71 (3.7%)            |
| Pathologic primary tumor size |                      |                      |                      |                      |
| 1                             | 533 (50.3%)          | 532 (42.7%)          | 615 (41.2%)          | 1126 (58.5%)         |
| 2                             | 498 (47.0%)          | 644 (51.7%)          | 776 (52.0%)          | 772 (40.1%)          |
| 3                             | 29 (2.7%)            | 70 (5.6%)            | 100 (6.7%)           | 27 (1.4%)            |
| Nodes Affected                |                      |                      |                      |                      |
| No                            | 1058 (99.8%)         | 0 (0.0%)             | 0 (0.0%)             | 1923 (99.9%)         |
| Yes                           | 2 (0.2%)             | 1246 (100.0%)        | 1491 (100.0%)        | 2 (0.1%)             |
| Unknown                       | 0 (0.0%)             | 0 (0.0%)             | 0 (0.0%)             | 0 (0.0%)             |
| ER                            |                      |                      |                      |                      |
| Negative                      | 418 (39.4%)          | 266 (21.3%)          | 553 (37.1%)          | 628 (32.6%)          |
| Positive                      | 641 (60.5%)          | 978 (78.5%)          | 931 (62.4%)          | 1293 (67.2%)         |
| Unknown                       | 1 (0.1%)             | 2 (0.2%)             | 7 (0.5%)             | 4 (0.2%)             |
| PR                            |                      |                      |                      |                      |
| Negative                      | 466 (44.0%)          | 379 (30.4%)          | 581 (39.0%)          | 763 (39.6%)          |
| Positive                      | 590 (55.7%)          | 860 (69.0%)          | 825 (55.3%)          | 1160 (60.3%)         |
| Unknown                       | 4 (0.4%)             | 7 (0.6%)             | 85 (5.7%)            | 2 (0.1%)             |

**Additional Table (cont): Characteristics of women enrolled in the four clinical trials**

| Variables                   | Study GEICAM/9805 | Study GEICAM/9906 | Study BCIRG001 | Study GEICAM/2003-02 |
|-----------------------------|-------------------|-------------------|----------------|----------------------|
|                             | N=1060            | N=1246            | N=1491         | N=1925               |
| HER2                        |                   |                   |                |                      |
| Negative                    | 561 (52.9%)       | 849 (68.1%)       | 965 (64.7%)    | 1704 (88.5%)         |
| Positive                    | 93 (8.8%)         | 276 (22.2%)       | 285 (19.1%)    | 181 (9.4%)           |
| Unknown                     | 406 (38.3%)       | 121 (9.7%)        | 241 (16.2%)    | 40 (2.1%)            |
| Type of Surgery             |                   |                   |                |                      |
| Mastectomy                  | 480 (45.3%)       | 751 (60.3%)       | 883 (59.2%)    | 526 (27.3%)          |
| Conservative                | 580 (54.7%)       | 495 (39.7%)       | 608 (40.8%)    | 1399 (72.7%)         |
| Unknown                     | 0 (0.0%)          | 0 (0.0%)          | 0 (0.0%)       | 0 (0.0%)             |
| Chemotherapy                |                   |                   |                |                      |
| No*                         | 9 (0.8%)          | 4 (0.3%)          | 11 (0.7%)      | 8 (0.4%)             |
| Yes                         | 1051 (99.2%)      | 1242 (99.7%)      | 1480 (99.3%)   | 1917 (99.6%)         |
| Hormonotherapy              |                   |                   |                |                      |
| None                        | 299 (28.2%)       | 251 (20.1%)       | 393 (26.4%)    | 510 (26.5%)          |
| Yes                         | 689 (65.0%)       | 995 (79.9%)       | 964 (64.7%)    | 1414 (73.5%)         |
| Unknown                     | 72 (6.8%)         | 0 (0.0%)          | 134 (9.0%)     | 1 (0.1%)             |
| Body Surface                |                   |                   |                |                      |
| 1.16-1.59                   | 234 (22.1%)       | 273 (21.9%)       | 262 (17.6%)    | 392 (20.4%)          |
| 1.59-1.67                   | 229 (21.6%)       | 293 (23.5%)       | 241 (16.2%)    | 378 (19.6%)          |
| 1.67-1.76                   | 213 (20.1%)       | 248 (19.9%)       | 292 (19.6%)    | 386 (20.1%)          |
| 1.76-1.86                   | 203 (19.2%)       | 228 (18.3%)       | 308 (20.7%)    | 385 (20.0%)          |
| 1.86-2.92                   | 178 (16.8%)       | 199 (16.0%)       | 388 (26.0%)    | 383 (19.9%)          |
| Unknown                     | 3 (0.3%)          | 5 (0.4%)          | 0 (0.0%)       | 1 (0.1%)             |
| Mean (SD)                   | 1.72 (0.16)       | 1.71 (0.16)       | 1.76 (0.19)    | 1.71 (0.16)          |
| BMI                         |                   |                   |                |                      |
| < 18.5                      | 17 (1.6%)         | 3 (0.2%)          | 31 (2.1%)      | 16 (0.8%)            |
| 18.5-24.9                   | 419 (39.5%)       | 464 (37.2%)       | 601 (40.3%)    | 828 (43.0%)          |
| 25.0-29.9                   | 369 (34.8%)       | 452 (36.3%)       | 488 (32.7%)    | 643 (33.4%)          |
| 30.0-34.9                   | 178 (16.8%)       | 223 (17.9%)       | 237 (15.9%)    | 313 (16.3%)          |
| ≥ 35.0                      | 74 (7.0%)         | 99 (7.9%)         | 134 (9.0%)     | 124 (6.4%)           |
| Unknown                     | 3 (0.3%)          | 5 (0.4%)          | 0 (0.0%)       | 1 (0.1%)             |
| Mean (SD)                   | 26.9 (5.1)        | 27.2 (5.0)        | 26.9 (5.5)     | 26.6 (4.9)           |
| Adverse Events              |                   |                   |                |                      |
| Grade 3                     | 215 (20.3%)       | 594 (47.7%)       | 440 (29.5%)    | 814 (42.3%)          |
| Grade 4                     | 49 (4.6%)         | 128 (10.3%)       | 50 (3.4%)      | 151 (7.8%)           |
| Undertreatment <sup>†</sup> |                   |                   |                |                      |
| Epirubicine                 | -                 | 82 (6.6%)         | -              | -                    |
| Cyclophosphamide            | 44 (4.3%)         | 77 (6.2%)         | 50 (3.5%)      | 12 (0.6%)            |
| Fluorouracil                | 7 (1.4%)          | 77 (6.2%)         | 8 (1.1%)       | 11 (0.6%)            |
| Doxorubicin                 | 24 (2.4%)         | -                 | 13 (0.9%)      | 13 (0.7%)            |
| Docetaxel                   | 29 (5.8%)         | -                 | 51 (7.5%)      | -                    |
| Paclitaxel                  | -                 | 89 (14.5%)        | -              | 36 (4.4%)            |

\* These women were randomized but did not received the corresponding treatment

† Defined as total dose received lower than 85% of the theoretical dose proposed in each of the trials and regimen arms
